# Supplementary material for: Deferoxamine Suppresses Collagen Cleavage and Protease, Cytokine, and COL10A1 Expression and Upregulates AMPK and Krebs Cycle Genes in Human Osteoarthritic Cartilage
Source: Hindawi journal article supplement (doi:10.1155/2016/6432867), 2016-01-01
Supplement: f1 [file 6432867.f1.pdf]

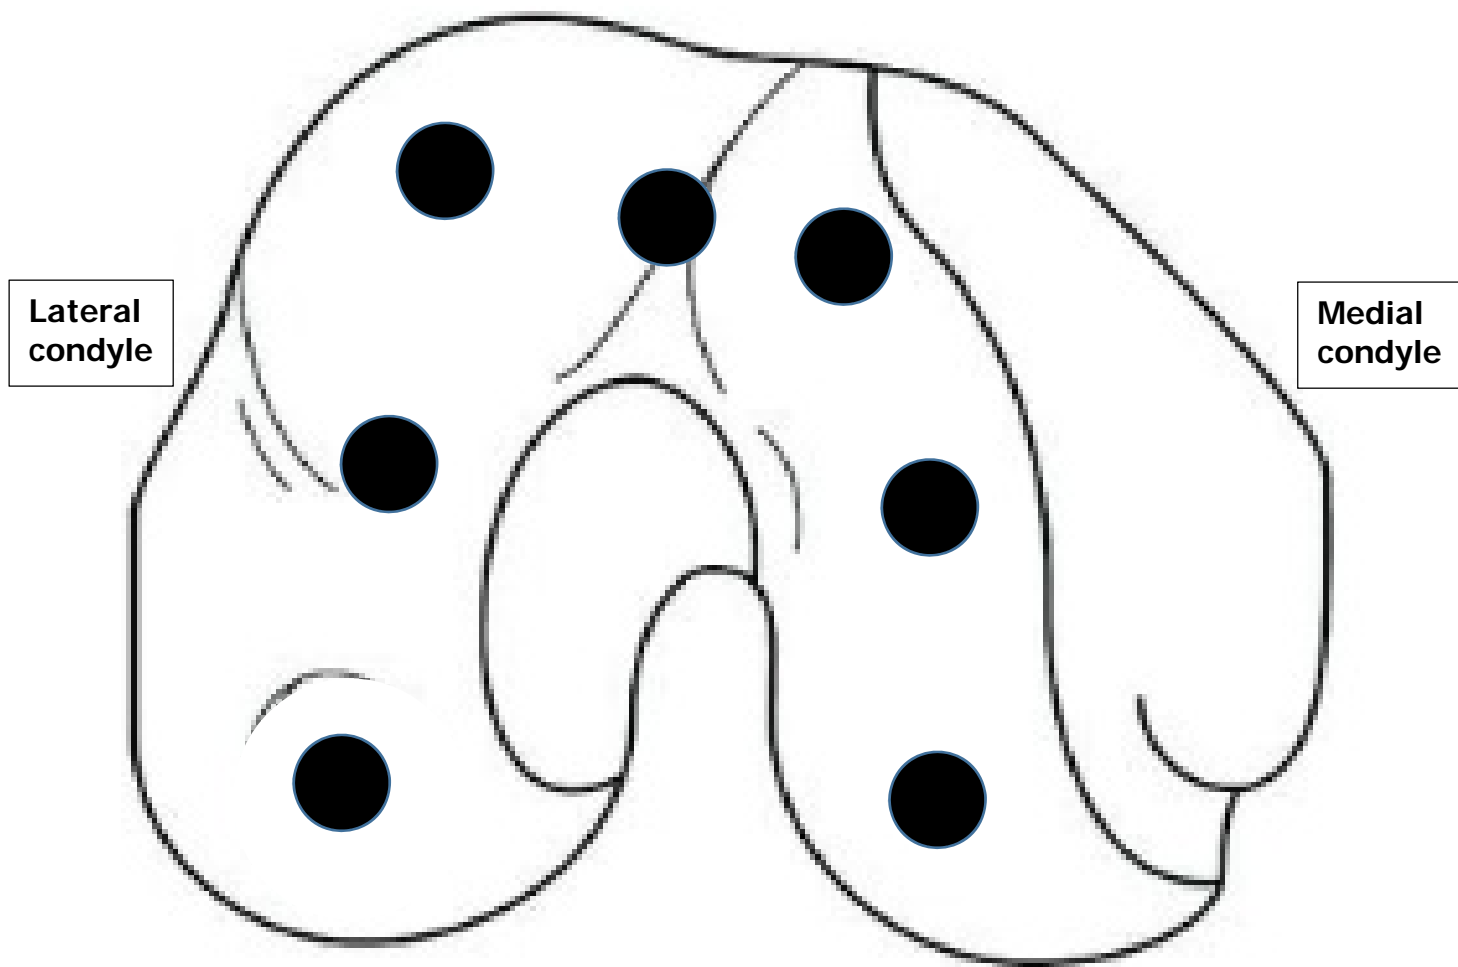

**Supplementary Figure.** Diagrammatic representation of human femoral head. Black circles indicate the sites of articular cartilage withdrawal from normal knee of control patients.
